1 **Sequence element enrichment analysis to determine the**  
2 **genetic basis of bacterial phenotypes**

3

4 John A. Lees<sup>1†</sup>, Minna Vehkala<sup>2†</sup>, Niko Välimäki<sup>3</sup>, Simon R. Harris<sup>1</sup>, Claire  
5 Chewapreecha<sup>4</sup>, Nicholas J. Croucher<sup>5</sup>, Pekka Marttinen<sup>6,7</sup>, Antti Honkela<sup>8</sup>, Julian  
6 Parkhill<sup>1</sup>, Stephen D. Bentley<sup>1</sup>, Jukka Corander<sup>2\*</sup>

7 <sup>1</sup>Pathogen Genomics, Wellcome Trust Sanger Institute, Cambridge, UK

8 <sup>2</sup>Department of Mathematics and Statistics, University of Helsinki, Helsinki,  
9 Finland

10 <sup>3</sup>Department of Medical and Clinical Genetics, Genome-Scale Biology Research  
11 Program, University of Helsinki

12 <sup>4</sup>Department of Medicine, University of Cambridge, Cambridge, UK

13 <sup>5</sup>Department of Infectious Disease Epidemiology, Imperial College, London, UK

14 <sup>6</sup>Department of Computer Science, Aalto University, Espoo, Finland

15 <sup>7</sup>Helsinki Institute of Information Technology HIIT, Department of Computer  
16 Science, Aalto University, Espoo, Finland

17 <sup>8</sup>Helsinki Institute for Information Technology HIIT, Department of Computer  
18 Science, University of Helsinki, Helsinki, Finland

19

20 \* Corresponding author: [jukka.corander@helsinki.fi](mailto:jukka.corander@helsinki.fi)

21 † These authors contributed equally.

22 **Abstract**

23 Bacterial genomes vary extensively in terms of both gene content and gene  
24 sequence – this plasticity hampers the use of traditional SNP-based methods for  
25 identifying all genetic associations with phenotypic variation. Here we introduce  
26 a computationally scalable and widely applicable statistical method (SEER) for  
27 the identification of sequence elements that are significantly enriched in a  
28 phenotype of interest. SEER is applicable to even tens of thousands of genomes  
29 by counting variable-length k-mers using a distributed string-mining algorithm.  
30 Robust options are provided for association analysis that also correct for the  
31 clonal population structure of bacteria. Using large collections of genomes of the  
32 major human pathogens *Streptococcus pneumoniae* and *Streptococcus pyogenes*,  
33 SEER identifies relevant previously characterised resistance determinants for  
34 several antibiotics and discovers potential novel factors related to the  
35 invasiveness of *S. pyogenes*. We thus demonstrate that our method can answer  
36 important biologically and medically relevant questions.

37

## 38 Introduction

39 The rapidly expanding repositories of genomic data for bacteria hold an  
40 enormous and yet largely untapped potential for building a more detailed  
41 understanding of the evolutionary responses to changing environmental  
42 conditions, such as the widespread use of antibiotics and switches between host-  
43 niche as farming practices change.

44

45 Genome-wide association studies (GWAS) for bacterial phenotypes have only  
46 recently started to appear<sup>1-5</sup>. Use of standard GWAS methods developed  
47 originally for human SNP data have been shown to be successfully applicable to  
48 core genome mutations in bacteria<sup>2,3</sup>. However, given the high level of genome  
49 plasticity of many of the known bacterial species, we can anticipate that such  
50 methods can only partially identify genetic determinants of phenotypic variation.  
51 To enable discovery of mechanisms related for instance to gene content,  
52 alternative alignment-free methods have also been introduced<sup>1,4</sup>. These methods  
53 use k-mers, i.e. DNA words of length k, as generalized alternatives to SNPs as  
54 putative explanations for observed differences in phenotype distributions. The  
55 main advantage of k-mers is their ability to capture several different types of  
56 variation present across a collection of genomes, including mutations,  
57 recombinations, variable promoter architecture, differences in gene content as  
58 well as capturing these variations in regions not present in all genomes.

59

60 The previous study using k-mers to overcome limitations of SNP-based  
61 association used Monte-Carlo simulations of word gain and loss along an  
62 inferred phylogeny to control for population structure<sup>1</sup>, whereas SNP-based  
63 studies have used clustering algorithms on a core alignment and stratified  
64 association tests on the resulting groups of samples<sup>2,3</sup>. The former does not scale  
65 computationally to the hundreds of isolates required to find lower effect-size  
66 associations, and the latter requires a core alignment, which lacks sensitivity and  
67 difficult to produce when there is a large number of samples, or they are  
68 particularly diverse.

69

70 Here we present a sequence element enrichment analysis (SEER), a method  
71 computationally scalable to tens of thousands of genomes, implemented as a  
72 stand-alone pipeline that uses either *de novo* assembled contigs or raw read data  
73 as input. We apply SEER to both simulated and real data from large and diverse  
74 populations, and show that it can accurately detect associations with antibiotic  
75 resistance caused by both presence of a gene and by SNPs in coding regions, as  
76 well as discover novel invasiveness factors.

77

## 78 Results

### 79 Implementation

80 SEER implements and combines three key insights which we discuss in turn: an  
81 efficient scan of all possible k-mers with a distributed string mining algorithm,  
82 an appropriate alignment-free correction for clonal population structure, and a  
83 fast and fully robust association analysis of all counted k-mers.

84

85 K-mers allow simultaneous discovery of both short genetic variants and entire  
86 genes associated with a phenotype. Longer k-mers provide higher specificity but  
87 less sensitivity than shorter k-mers. Rather than arbitrarily selecting a length  
88 prior to analysis or having to count k-mers at multiple lengths and combine the  
89 results, we provide an efficient implementation that allows counting and testing  
90 simultaneously at all k-mers at lengths over 9 bases long.

91

92 We offer three different methods to count k-mers in all samples in a study. For  
93 very large studies, or for counting directly from reads rather than assemblies, we  
94 provide an implementation of distributed string mining (DSM)<sup>6,7</sup> which limits  
95 maximum memory usage per core, but requires a large cluster to run. For data  
96 sets up to around 5 000 sample assemblies we have implemented a single core  
97 version fsm-lite (<https://github.com/nvalimak/fsm-lite>). For comparison with  
98 older datasets, or where resources do not allow the storage of the entire k-mer  
99 index in memory, DSK<sup>8</sup> is used to count a single k-mer length in each sample  
100 individually, the results of which are then combined.

101

102 To correct for the clonal population structure of bacterial populations, a distance  
103 matrix is constructed from a random subsample of these k-mers, on which multi-  
104 dimensional scaling is performed (Supplementary figure 1). Compared with  
105 modelling SNP variation<sup>9</sup>, use of k-mers as variable sequence elements has been  
106 previously shown to accurately estimate bacterial population structure. The  
107 projections of each sample in three dimensions are used as covariates to control  
108 for the clonal population structure. Simulations of bacterial genomes using a  
109 known tree showed this method gave a higher resolution control than using only  
110 population clustering (Supplementary figure 2). Before testing for association we  
111 filter k-mers based on their frequency and unadjusted p-value to reduce false  
112 positives from testing underpowered k-mers and reduce computational time.

113

114 Then, for each k-mer, a logistic curve is fitted to binary phenotype data, and a  
115 linear model to continuous data, using a time efficient optimisation routine to  
116 allow testing of all k-mers. Bacteria can be subject to extremely strong selection  
117 pressures, producing common variants with very large effect sizes, such as  
118 antibiotics inducing resistance-conferring variants. This can make the data  
119 perfectly separable, and consequently the maximum likelihood estimate ceases  
120 to exist for the logistic model. Firth regression<sup>10</sup> has been used to obtain results  
121 in these cases.

122

123 For the basal cut-off for significance we use  $p < 0.05$ , which in our testing we  
124 conservatively Bonferroni corrected to the threshold  $1 \times 10^{-8}$  based on every  
125 position in the *S. pneumoniae* genome having three possible mutations<sup>11</sup>, and all  
126 this variation being uncorrelated. This is a strict cut-off level that prevents a  
127 large number of false-positives due to the extensive amount of k-mers being  
128 tested, but does not over-penalise by correcting directly on the basis of the  
129 number of k-mers counted. Simulations suggested a cut-off of  $1.4 \times 10^{-8}$  would be  
130 appropriate, supporting this reasoning. Association effect size and p-value of the  
131 MDS components can also be included in the output, to compare lineage and  
132 variant effects on the phenotype variation.

133

134 K-mers reaching significance are filtered post-association and mapped onto both  
135 a well-annotated reference sequence and the annotated draft assemblies to allow  
136 discovery of variation in accessory genes not present in the reference strain. The  
137 significant k-mers themselves can also be assembled into a longer consensus  
138 sequence. Annotating variants by predicted function and effect (against a  
139 reference sequence) in the resulting k-mers facilitates fine-mapping of SNPs and  
140 small indels.

141

142 Meta-analysis of association studies increases sample size, which improves  
143 power and reduces false-positive rates<sup>12</sup>. To facilitate meta-analysis of k-mers  
144 across studies, the output of SEER includes effect size, direction and standard  
145 error, which can be used directly with existing software to meta-analyse all  
146 overlapping k-mers.

147

148 SEER is implemented in C++, and available at <https://github.com/johnlees/seer>  
149 as source code and a pre-compiled binary.

#### 150 **Application to simulated data**

151 To test the power of SEER across different sample sizes, we simulated 3 069  
152 *Streptococcus pneumoniae* genomes from the phylogeny observed in a Thai  
153 refugee camp<sup>13</sup> using parameters estimated from real data including  
154 accumulation of SNPs, indels (Supplementary figure 3), gene loss and  
155 recombination events. Using knowledge of the true alignments, we then  
156 artificially associated an accessory gene with a phenotype over a range of odds-  
157 ratios and evaluated power at different sample sizes (Fig. 1a). The expected  
158 pattern for this power calculation is seen, with higher odds-ratio effects being  
159 easier to detect. Currently detected associations in bacteria have had large effect  
160 sizes (OR > 28 host-specificity<sup>1</sup>, OR > 3 beta-lactam resistance<sup>2</sup>), and the required  
161 sample sizes predicted here are consistent with these discoveries.

162

163 The large k-mer diversity, along with the population stratification of gene loss,  
164 makes the simulated estimate of the sample size required to reach the stated  
165 power clearly conservative. Convergent evolution along multiple branches of a

166 phylogeny for a real population reacting to selection pressures will reduce the  
167 required sample size<sup>14</sup>.

168

169 We also used k-mers counted at constant lengths by DSK to perform the gene  
170 presence/absence association (Fig. 1b). Counting all informative k-mers rather  
171 than a range of pre-defined k-mer lengths gives greater power to detect  
172 associations, with 80% power being reached at around 1 500 samples, compared  
173 with 2 000 samples required by the pre-defined lengths. The slightly lower  
174 power at low sample numbers is due to a stricter Bonferroni adjustment being  
175 applied to the larger number of DSM k-mers over the DSK k-mers. This is exactly  
176 the expected advantage from including shorter k-mers to increase sensitivity, but  
177 as k-mers are correlated with each other due to evolving along the same  
178 phylogeny, using the same Bonferroni correction for multiple testing does not  
179 decrease specificity.

180

181 The strong linkage disequilibrium (LD) caused by the clonal reproduction of  
182 bacterial populations means that non-causal k-mers may also appear to be  
183 associated. This is well documented in human genetics; non-causal variants tag  
184 the causal variant increasing discovery power, but make it more difficult to fine-  
185 map the true link between genotype and phenotype<sup>15</sup>. In simulations it is difficult  
186 to replicate the LD patterns observed in real populations, as recombination maps  
187 for specific bacterial lineages are not yet known. To evaluate fine-mapping  
188 power of a SNP we instead used the real sequence data and simulated  
189 phenotypes based on changing the effect size of a known causal variant and  
190 evaluating the physical distance of significant k-mers from the variant site.

191

192 Using DSM we counted 68M k-mers which we then tested for association. The  
193 2 639 significant k-mers were placed into three categories if after mapping to a  
194 reference genome they contained the causal variant I100L (10), were within the  
195 same gene (74), or within 2.5kb in either direction (207). Figure 1c) shows the  
196 resulting power when random subsamples of the population are taken. As  
197 expected, power is higher when not specifying that the causal variant must be

198 hit, as there are many more k-mers which are in LD with the SNP than directly  
199 overlapping it, thus increasing sensitivity.

200 **Confirmation of known resistance mechanisms in a large population of *S.***  
201 ***pneumoniae***

202 SEER was applied to the sequenced genomes from the study described above,  
203 using measured resistance to five different antibiotics as the phenotype:  
204 chloramphenicol, erythromycin,  $\beta$ -lactams, tetracycline and trimethoprim.  
205 Chloramphenicol resistance is conferred by the *cat* gene on the integrative  
206 conjugative element (ICE) Tn5253 in the *S. pneumoniae* chromosome, and  
207 similarly tetracycline resistance is conferred by the *tetM* gene which is also  
208 carried on the ICE<sup>16</sup>. For both of these drug resistance phenotypes the ICE  
209 contains 99% of the significant k-mers, and the causal genes rank highly within  
210 the clusters (Table 1, Supplementary figure 4).

211

212 Resistance to erythromycin is also conferred by presence of a gene, but there are  
213 multiple genes that can perform the same function (*ermB*, *mef*, *mel*)<sup>17</sup>. In the  
214 population studied, this phenotype was strongly associated with two large  
215 lineages (Supplementary figure 5), making the task of disentangling association  
216 with a lineage versus a specific locus more difficult. Significant k-mers are found  
217 in the mega and omega cassettes, which carry the *mel/mef* and *ermB* resistance  
218 elements respectively. Some k-mers do not map to the reference, as they are due  
219 to lineage specific associations with genetic elements not found in the reference  
220 strain. This highlights both the need to map to a close reference or draft  
221 assembly to interpret hits, as well as the use of functional follow-up to validate  
222 potential hits from SEER.

223

224 Multiple mechanisms of resistance to  $\beta$ -lactams are possible<sup>2</sup>. Here, we consider  
225 just the most important (i.e. highest effect size) mutations, which are SNPs in the  
226 penicillin binding proteins *pbp2x*, *pbp2b* and *pbp1a*. In this case looking at  
227 highest coverage annotations finds these genes, but is not sufficient as so many  
228 k-mers are significant – either due to other mechanisms of resistance, physical  
229 linkage with causal variants or co-selection for resistance conferring mutations.  
230 Instead, looking at the k-mers with the most significant p-values gives the top



231 four hit loci as *pbp2b* ( $p=10^{-132}$ ), *pbp2x* ( $p=10^{-96}$ ), putative RNA pseudouridylate  
232 synthase UniParc B8ZPU5 ( $p=10^{-92}$ ) and *pbp1a* ( $p=10^{-89}$ ). The non-*pbp* hit is a  
233 homologue of a gene in linkage disequilibrium with *pbp2b*, which would suggest  
234 mismapping rather than causation of resistance.

235

236 Trimethoprim resistance in *S. pneumoniae* is conferred by the SNP I100L in the  
237 *folA/dyr* gene<sup>18</sup>. The *dpr* and *dpr* genes, which are adjacent in the genome, have  
238 the highest coverage of significant k-mers (Fig. 2). Following our fine-mapping  
239 procedure, we call four high-confidence SNPs that are predicted to be more likely  
240 to affect protein function than synonymous SNPs. One is the causal SNP, and the  
241 others appear to be hitchhikers in LD with I100L. By evaluating whether sites are  
242 conserved across the protein family<sup>19</sup>, the known causal SNP is ranked as the  
243 highest variant, showing that in this case fine-mapping is possible using the  
244 output from SEER.

245

246 We then compared the results from SEER with the results from two existing  
247 methods (as described in online methods). The first method uses mapping of  
248 SNPs against a reference, followed by applying the Cochran–Mantel–Haenszel  
249 test at every variable site<sup>2</sup>. The second uses *dsk*<sup>8</sup> to count k-mers of length 31,  
250 and a highly robust correction for population structure which scales to around  
251 100 genomes<sup>1</sup>.

252

253 The results are shown in supplementary table 1. Both SEER and association of a  
254 core mapping of SNPs identify resistances caused by presence of a gene, when it  
255 is present in the reference used for mapping. Both produce their most significant  
256 p-values in the causal element, though SEER appears to have a lower false-  
257 positive rate. However, as demonstrated by chloramphenicol resistance, if not  
258 enough SNP calls are made in the causal gene this hinders fine-mapping. SNP-  
259 mediated resistance showed the same pattern since many other SNPs were  
260 ranked above the causal variant. In the case of  $\beta$ -lactam resistance both methods  
261 seem to perform equally well, likely due to the higher rate of recombination and  
262 the creation of mosaic *pbp* genes.

263

264 Additionally, as for erythromycin resistance, when an element is not present in  
265 the reference SNPs have been called against it is not detectable in SNP-based  
266 association analysis. In such cases multiple mappings against other reference  
267 genomes would have to be made, which is a tedious and computationally costly  
268 procedure. Alternatively a draft assembly with the phenotype from the study  
269 could be picked as a second reference to map to, however this may be lower  
270 quality than those in public databases picked by genetic content rather than  
271 phenotype, and would not necessarily be able to detect multiple genetic  
272 mechanisms (as in the case of erythromycin resistance, no single sequenced  
273 genome contains all known resistance mechanisms).

274

275 Since the k-mer results from SEER are reference-free, these issues are avoided as  
276 just the significant k-mers can quickly be mapped to all available references.  
277 Alternatively, the significant k-mers can be mapped to all draft assemblies in the  
278 study, at least one of which is guaranteed to contain the k-mer, to check if any  
279 annotations are overlapped.

280

281 For the small sample, 31mer approach significance was not reached for  
282 chloramphenicol, tetracycline or trimethoprim as the effect size of any k-mer is  
283 too small to be detected in the number of samples accessible by the method.  
284 Erythromycin had 19 307 hits, and  $\beta$ -lactams 419 hits, at between 1-2% MAF  
285 which are all false positives that would likely have been excluded by a fully  
286 robust population structure correction method.

### 287 **Discovery of conjugative elements associated with *Streptococcus pyogenes*** 288 **isolation location and invasiveness**

289 Most bacterial GWAS studies to date have searched for genotypic variants that  
290 contribute towards or completely explain antibiotic resistance phenotypes. As a  
291 proof of principle that SEER can be used for the discovery stage of sequence  
292 elements associated with other clinically important phenotypes, we applied our  
293 tool to 675 *S. pyogenes* (group A *Streptococcus*) genomes from invasive and non-  
294 invasive isolates.

295

296 The top hit was the *tetM* gene in a conjugative transposon (Tn916) carried by  
297 23% of isolates (Supplementary figures 6 and 7). These elements are variably  
298 present in the chromosome of *S. pyogenes*<sup>20</sup>, and the lack of co-segregation with  
299 population structure explains our power to discover the association. However, as  
300 a different proportion of the isolates from each collection were invasive (Fiji –  
301 13%; Kilifi – 43%), the significant k-mers will also include elements specific to  
302 Kilifi. Indeed, we found that this version of Tn916 was never present in genomes  
303 collected from Fiji. When country of isolation was included as a covariate in the  
304 regression, these hits were no longer significant – highlighting the importance of  
305 such considerations in performing association studies in large bacterial  
306 populations.

307

308 After applying this correction, we find two significant hits (Supplementary figure  
309 8). The first corresponds to SNPs associating a specific allele of *pepF*  
310 (Oligoendopeptidase F; UniProt:P54124) with invasive isolates. This could  
311 indicate a recombination event, due to the high SNP density and discordance  
312 with vertical evolution with respect to the inferred phylogeny<sup>21,22</sup>. The second hit  
313 represents SNPs in the intergenic region upstream of both IgG-binding protein H  
314 and *nrdI* (ribonucleotide reductase). If this were found to affect expression of the  
315 IgG-binding protein, this would be a plausible novel genetic mechanism affecting  
316 pathogenesis<sup>23,24</sup>.

317

318 The association of both of these variations would have to be validated either *in*  
319 *vitro* or a replication cohort, and functional follow-up such as RNA-seq may also  
320 further help with their interpretation.

321

322 Applying a Cochran-Mantel-Haenszel test to SNPs called against a reference  
323 sequence found no sites significantly associated with invasiveness. The *tetM*  
324 gene and transposon are not found in the reference sequence, and therefore  
325 cannot be discovered by this method. The population structure is so diverse that  
326 88 different clusters are found, which overcorrects leaving too few samples  
327 within each group to have power to discover associations.

## 328 **Discussion**

329 SEER is a reference-independent, scalable pipeline capable of finding bacterial  
330 sequence elements associated with a range of phenotypes while controlling for  
331 clonal population structure. The sequence elements can be interpreted in terms  
332 of protein function using sequence databases, and we have shown that even  
333 single causal variants can be fine-mapped using the SEER output.

334

335 Our use of all informative k-mers together with robust regression methods, and  
336 the ability to analyse very large sample sizes show improved sensitivity over  
337 existing methods. This provides a generic approach capable of analysing the  
338 rapidly increasing number of bacterial whole genome sequences linked with a  
339 range of different phenotypes. The output can readily be used in a meta-analysis  
340 of sequence elements to facilitate the combination of new studies with published  
341 data, increasing both discovery power and confirming the significance of results.  
342 As with all association methods, our approach is limited by the amount of  
343 recombination and convergent evolution that occurs in the observed population,  
344 since the discovery of causal sequence elements is principally constrained by the  
345 extent of linkage disequilibrium. However, by introducing improved  
346 computational scalability and statistical sensitivity SEER significantly pushes the  
347 existing boundaries for answering important biologically and medically relevant  
348 questions.

## 349 **Online methods**

### 350 **Counting informative k-mers in samples**

351 Over all  $N$  samples, all k-mers over 9 bases long that occur in more than one  
352 sample are counted. All non-informative k-mers are omitted from the output; a  
353 k-mer  $X$  is not informative if any one base extension to the left ( $aX$ ) or right ( $Xa$ )  
354 has exactly the same frequency support vector as  $X$ . The frequency support  
355 vector has  $N$  entries, each being the number of occurrences of k-mer  $X$  in that  
356 sample. Further filtering conditions are explained in the sections below.

357

358 Distributed string mining (DSM)<sup>6,7</sup> parallelises to as much as one sample per  
359 core, and either 16 or 64 master server processes. DSM includes an optional

360 entropy-filtering setting that filters the output k-mers based on both number of  
361 samples present and frequency distribution. On our 3 069 simulated genomes  
362 this took 2 hrs 38 min on 16 cores, and used 1Gb RAM. The distributed approach  
363 is applicable up to terabytes of short-read data<sup>7</sup>, but requires a cluster  
364 environment to run. As an easy-to-use alternative, we propose a single core  
365 version of DSM that is applicable for gigabyte-scale data. We implemented the  
366 single core version based on a succinct data structure library<sup>25</sup> to produce the  
367 same output as DSM. On 675 *S. pyogenes* genomes this took 3hrs 44min and used  
368 22.3Gb RAM.

369

370 To count single k-mer lengths, an associative array was used to combine the  
371 results from DSK in memory. We concatenated results from k-mer lengths of 21,  
372 31 and 41, as in previous studies<sup>1</sup>. This can scale to large genome numbers by  
373 instead using external sorting to avoid storing the entire array in memory.

#### 374 **Filtering k-mers**

375 K-mers are filtered if either they appear in <1% or >99% of samples, or are over  
376 100 bases long. We also test if the p-value of association in a simple  $\chi^2$  test (1  
377 d.f.) is less than  $10^{-5}$ , as in simulations this was true for all true positives. In the  
378 case of a continuous phenotype a Welch two-sample t-test is used instead.

#### 379 **Covariates to control for population structure**

380 A random sample of between 0.1% and 1% of k-mers appearing in between 5-  
381 95% of isolates is taken. We then construct a pairwise distance matrix **D**, with  
382 each element being equal to a sum over all *m* sampled k-mers:

$$d_{ij} = \sum_m \|k_{im} - k_{jm}\|$$

383 where  $k_{im}$  is 1 if the *m*th sampled k-mer is present in sample *i*, and 0 otherwise.

384

385 Metric multi-dimensional scaling is then performed, projecting these distances  
386 into three dimensions. The normalised eigenvectors of each dimension are used  
387 as covariates in the regression model. The number of dimensions used is a user-  
388 adjustable parameter, and can be evaluated by the goodness-of-fit and the  
389 magnitude of the eigenvalues. In species tree with two lineages and 96 isolates

390 one dimension was sufficient as a population control, whereas for the larger  
391 collection of 3069 isolates 10-15 dimensions were needed to give tight control  
392 (Supplementary figure 9). Over all our studies, generally three dimensions  
393 appeared a good trade-off between sensitivity and specificity.

#### 394 **Logistic and linear regression**

395 For samples with binary outcome vector  $\mathbf{y}$ , for each k-mer a logistic model is  
396 fitted:

$$\log\left(\frac{\mathbf{y}}{\mathbf{I} - \mathbf{y}}\right) = \mathbf{X}\boldsymbol{\beta}$$

397 where absence and presence for each k-mer coded as 0 and 1 respectively in  
398 column 2 of the design matrix  $\mathbf{X}$  (column 1 is a vector of ones, giving an intercept  
399 term). Subsequent columns  $j$  of  $\mathbf{X}$  contain the eigenvectors of the MDS projection,  
400 user-supplied categorical covariates (dummy encoded), and quantitative  
401 covariates (normalised). The BFGS algorithm is used to maximise the log  
402 likelihood  $L$  in terms of the gradient vector  $\boldsymbol{\beta}$  (using an analytic expression for  
403  $d(\log L)/d\boldsymbol{\beta}$ ):

$$\log L \propto \sum_i y_i \cdot \log(\text{sig}(\mathbf{X}\boldsymbol{\beta})_i) + (1 - y_i) \cdot \log(\text{sig}(1 - \mathbf{X}\boldsymbol{\beta})_i)$$

404 where sig is the sigmoid function. If this fails to converge,  $n$  Newton-Raphson  
405 iterations are applied to  $\boldsymbol{\beta}$ :

$$\boldsymbol{\beta}_{n+1} = \boldsymbol{\beta}_n + [-L''(\boldsymbol{\beta}_n)]^{-1} \cdot L'(\boldsymbol{\beta}_n)$$

406 from a starting point using the mean phenotype as the intercept, and the root-  
407 mean squared beta from a test of k-mers passing filtering

$$\beta_{0,0} = \frac{\sum y_i}{n}$$
$$\beta_{0,j>0} = 0.1$$

408 which is slower, but has a higher success rate. If this fails to converge due to the  
409 observed points being separable in the high dimensional space, or the standard  
410 error of the slope is greater than 3 (which empirically indicated almost separable  
411 data, with no counts in one element of the contingency table), Firth logistic  
412 regression<sup>10</sup> is then applied. This adds an adjustment to  $\log L$ :

$$\log L(\boldsymbol{\beta})^* = \log L(\boldsymbol{\beta}) + \frac{1}{2} \cdot \log \left| \frac{d^2 L}{d\boldsymbol{\beta}^2}(\boldsymbol{\beta}) \right|$$

413 using which Newton-Raphson iterations are applied as above.

414

415 In the case of a continuous phenotype a linear model is fitted:

$$Y = X\beta$$

416 The squared distance  $U(\beta)$

$$U(\beta) = \|y - X\beta\|^2$$

417 is minimised using the BFGS algorithm. If this fails to converge then the analytic

418 solution is obtained by orthogonal decomposition:

$$X = QR$$

419 then back-solving for  $\beta$  in:

$$R\beta = Q^T y$$

420

421 In both cases the standard error on  $\beta_1$  is calculated by inverting the Fisher

422 information matrix  $d^2L/d\beta^2$  (inversions are performed by Cholesky

423 decomposition, or if this fails due to the matrix being almost singular the Moore-

424 Penrose pseudoinverse is taken) to obtain the variance-covariance matrix. The

425 Wald statistic is calculated with the null hypothesis of no association ( $\beta_1 = 0$ ):

$$W = \frac{\beta_1}{SE(\beta_1)}$$

426 which is the test statistic of a  $\chi^2$  distribution with 1 d.f. This is equivalent to the

427 positive tail of a standard normal distribution, the integral of which gives the p-

428 value. To calculate an empirical significance testing cut-off for the p-value under

429 multiple correlated tests, we observed the distribution of p-values from 100

430 random permutations of phenotype. Setting the family-wise error rate (FWER) at

431 0.05 gave a cut-off of  $1.4 \times 10^{-8}$ .

#### 432 **SEER implementation**

433 SEER is implemented in C++ using the armadillo linear algebra library<sup>26</sup>, and dlib

434 optimisation library<sup>27</sup>. On a simulation of 3 069 diverse 0.4Mb genomes, 143M k-

435 mers were counted by DSM and 25M 31-mers by DSK. On the largest DSM set,

436 using 16 cores and subsampling 300 000 k-mers (0.2% of the total), calculating

437 population covariates took 6hr 42min and 8.33GB RAM. This step is  $O(N^2M)$

438 where N is number of samples and M is number of k-mers, but can be  
439 parallelised across up to  $N^2$  cores.

440

441 Processing all 143M informative k-mers as described took 69min 44s and 23MB  
442 RAM on 16 cores. This step is  $O(M)$  and can be parallelised across up to M cores.

443

444 On the real dataset of full length genomes the 68M informative k-mers counted  
445 was less than the simulated dataset above, as the parameters of the simulation  
446 created particularly diverse final genomes.

#### 447 **Interpreting significant k-mers**

448 K-mers reaching the threshold for significance are then post-association filtered  
449 requiring  $\beta_1 > 0$  as a negative effect size does not make biological sense.

450 Remaining k-mers are searched for by exact match in their *de novo* assemblies,  
451 and annotations of features examined for overlap of function. BLAT<sup>28</sup> is also used  
452 with a step size of 2 and minimum match size of 15 to find inexact but close  
453 matches to a well annotated reference sequence.

454

455 To better search for gene clusters associated with phenotype, these k-mers are  
456 assembled using Velvet<sup>29</sup> choosing a smaller sub-k-mer size which maximises  
457 longest contig length of the final assembly. K-mers which are then substrings of  
458 others significant k-mers are removed.

#### 459 **Mapping of a single SNP**

460 Using the BLAT mapping of significant k-mers to a reference sequence, SNPs are  
461 called using bcftools<sup>30</sup>. Quality scores for a read are set to be identical, and are  
462 set as the Phred-scaled Holm-adjusted p-values from association. High quality  
463 (QUAL > 100) SNPs are then annotated for function using SnpEff<sup>31</sup>, and the effect  
464 of missense SNPs on protein function is ranked using SIFT<sup>19</sup>.

#### 465 **Comparison to existing methods**

466 We compare to two existing methods. The first uses a core-genome SNP mapping  
467 along with population clusters defined from the same alignment to perform a  
468 Cochran-Mantel-Haenszel test at every called variant site<sup>2</sup>. The second uses a



469 fixed k-mer length of 31 as counted by dsk<sup>8</sup>, with a Monte Carlo phylogeny-based  
470 population control<sup>1</sup>. As the second method is not scalable to this population size  
471 we used our population control as calculated from all genomes in the population,  
472 and a subsample of 100 samples to calculate association statistics, which is  
473 roughly the number computationally accessible by this method. In both cases,  
474 the same Bonferroni correction is used as for SEER.

#### 475 **Simulating bacterial populations**

476 A random subset of 450 genes from the *Streptococcus pneumoniae* ATCC  
477 700669<sup>16</sup> strain were used as the starting genome for ALF<sup>32</sup>. ALF simulated 3069  
478 final genomes along the phylogeny observed in a Thai refugee camp<sup>13</sup>. An  
479 alignment between *S. pneumoniae* strains R6, 19F and *Streptococcus mitis* B6  
480 using Progressive Cactus was used to estimate rates in the GTR matrix and the  
481 size distribution of insertions and deletions (INDELs – Supplementary figure 3).  
482 Previous estimates for the relative rate of SNPs to INDELs<sup>33</sup> and the rate of  
483 horizontal gene transfer and loss<sup>13</sup> were used.  
484 pIRS<sup>34</sup> was used to simulate error-prone reads from genomes at the tips of the  
485 tree, which were then assembled by Velvet<sup>29</sup>. DSM was used to count k-mers  
486 from these *de novo* assemblies.

487  
488 To test the similarity of the population control to existing methods, 96 full  
489 *Streptococcus pneumoniae* ATCC 700669 genomes were evolved with ALF.  
490 Intergenic regions were also evolved using Dawg<sup>35</sup> at a previously determined  
491 rate<sup>36</sup>. These were combined, and assemblies generated and k-mers counted as  
492 above. A distance matrix was created from 1% of the k-mers as described above,  
493 and a neighbour-joining tree produced from this.

494  
495 The resulting tree was ranked against the true tree by counting one for each pair  
496 of isolates in each BAPS<sup>37</sup> cluster which had an isolate not in the same BAPS  
497 cluster as a descendent of their MRCA.

#### 498 **Simulating phenotype based on genotype and odds-ratio**

499 Ratio of cases to controls in the population ( $S_R$ ) was set at 50% to represent  
500 antibiotic resistance, and a single variant (gene presence/absence or a SNP) was

501 designated as causal. Minor allele frequency (MAF) in the population is set from  
502 the simulation, and odds-ratio (OR) can be varied. The number of disease cases  
503  $D_E$  is then the solution to a quadratic equation<sup>38</sup>, which is related to probability of  
504 a sample being a case by:

$$p_{\text{case}|\text{exposed}} = \frac{D_E}{\text{MAF}}$$
$$p_{\text{case}|\text{not exposed}} = \frac{\frac{S_R}{S_R + 1} - D_E}{1 - \text{MAF}}$$

505 The population was then randomly subsampled 100 times, with case and control  
506 status assigned for each run using these formulae. Power was defined by the  
507 proportion of runs that had at least one k-mer in the gene associated with  
508 phenotype reaching significance.

#### 509 **Elements enriched in *S. pyogenes* invasiveness**

510 We sequenced 675 isolates of *S. pyogenes* on the Illumina HiSeq platform, of  
511 which 347 were from Fiji and 328 were from Kilifi. We defined those isolated  
512 from blood, cerebrospinal fluid (CSF) or broncho-pulmonary aspirate as invasive  
513 (n = 185), and those isolated from throat, skin or urine as non-invasive (n = 490).  
514 Including country as a categorical covariate was necessary, as without doing so  
515 many elements which stratify by isolate collection appear as significant. The  
516 SEER pipeline was run as described, yielding 1233 k-mers which exceeded the  
517 threshold for significance.

518

519 BLAST of the k-mers with the nr/nt database was used to determine a suitable  
520 reference to map to, and after mapping SNPs were called as above.

#### 521 **References**

522

- 523 1. Sheppard, S. K. *et al.* Genome-wide association study identifies vitamin B5  
524 biosynthesis as a host specificity factor in *Campylobacter*. *Proc. Natl. Acad.*  
525 *Sci.* **110**, 11923–11927 (2013).  
526
- 527 2. Chewapreecha, C. *et al.* Comprehensive Identification of Single Nucleotide  
528 Polymorphisms Associated with Beta-lactam Resistance within  
529 Pneumococcal Mosaic Genes. *PLoS Genet.* **10**, e1004547 (2014).  
530

- 531 3. Laabei, M. *et al.* Predicting the virulence of MRSA from its genome  
532 sequence. *Genome Res.* **24**, 839–849 (2014).  
533
- 534 4. Weinert, L. a. *et al.* Genomic signatures of human and animal disease in the  
535 zoonotic pathogen *Streptococcus suis*. *Nat. Commun.* **6**, 6740 (2015).  
536
- 537 5. Chen, P. E. & Shapiro, B. J. The advent of genome-wide association studies  
538 for bacteria. (2015).  
539
- 540 6. Välimäki, N. & Puglisi, S. in *Algorithms Bioinforma. SE - 35* (Raphael, B. &  
541 Tang, J.) **7534**, 441–452 (Springer Berlin Heidelberg, 2012).  
542
- 543 7. Seth, S., Välimäki, N., Kaski, S. & Honkela, A. Exploration and retrieval of  
544 whole-metagenome sequencing samples. *Bioinformatics* **30**, 16 (2014).  
545
- 546 8. Rizk, G., Lavenier, D. & Chikhi, R. DSK: K-mer counting with very low  
547 memory usage. *Bioinformatics* **29**, 652–653 (2013).  
548
- 549 9. Tasoulis, S. *et al.* Random projection based clustering for population  
550 genomics. in *2014 IEEE Int. Conf. Big Data (Big Data)* 675–682 (2014).  
551 doi:10.1109/BigData.2014.7004291  
552
- 553 10. Heinze, G. & Schemper, M. A solution to the problem of separation in  
554 logistic regression. *Stat. Med.* **21**, 2409–2419 (2002).  
555
- 556 11. Ford, C. B. *et al.* Mycobacterium tuberculosis mutation rate estimates from  
557 different lineages predict substantial differences in the emergence of drug-  
558 resistant tuberculosis. *Nat. Genet.* **45**, 784–790 (2013).  
559
- 560 12. Evangelou, E. & Ioannidis, J. P. A. Meta-analysis methods for genome-wide  
561 association studies and beyond. *Nat. Rev. Genet.* **14**, 379–389 (2013).  
562
- 563 13. Chewapreecha, C. *et al.* Dense genomic sampling identifies highways of  
564 pneumococcal recombination. *Nat. Genet.* **46**, 305–9 (2014).  
565
- 566 14. Farhat, M. R. *et al.* Genomic analysis identifies targets of convergent  
567 positive selection in drug-resistant Mycobacterium tuberculosis. *Nat.*  
568 *Genet.* **45**, 1183–9 (2013).  
569
- 570 15. Spain, S. L. & Barrett, J. C. Strategies for fine-mapping complex traits. *Hum.*  
571 *Mol. Genet.* **24**, R111–R119 (2015).

572

- 573 16. Croucher, N. J. *et al.* Role of conjugative elements in the evolution of the  
574 multidrug-resistant pandemic clone *Streptococcus pneumoniae*Spain23F  
575 ST81. *J. Bacteriol.* **191**, 1480–1489 (2009).  
576
- 577 17. Croucher, N. J. *et al.* Rapid pneumococcal evolution in response to clinical  
578 interventions. *Science* **331**, 430–4 (2011).  
579
- 580 18. Maskell, J. P., Sefton, a. M. & Hall, L. M. C. Multiple mutations modulate the  
581 function of dihydrofolate reductase in trimethoprim-resistant  
582 *Streptococcus pneumoniae*. *Antimicrob. Agents Chemother.* **45**, 1104–1108  
583 (2001).  
584
- 585 19. Ng, P. C. & Henikoff, S. SIFT: predicting amino acid changes that affect  
586 protein function. *Nucleic Acids Res.* **31**, 3812–3814 (2003).  
587
- 588 20. Roberts, A. P. & Mullany, P. A modular master on the move: the Tn916  
589 family of mobile genetic elements. *Trends Microbiol.* **17**, 251–258 (2009).  
590
- 591 21. Dubnau, D. DNA Uptake in Bacteria. *Annu. Rev. Microbiol.* **53**, 217–244  
592 (1999).  
593
- 594 22. Lefébure, T. & Stanhope, M. J. Evolution of the core and pan-genome of  
595 *Streptococcus*: positive selection, recombination, and genome  
596 composition. *Genome Biol.* **8**, R71 (2007).  
597
- 598 23. Raeder, R. & Boyle, M. D. Association between expression of  
599 immunoglobulin G-binding proteins by group A streptococci and virulence  
600 in a mouse skin infection model. *Infect. Immun.* **61**, 1378–1384 (1993).  
601
- 602 24. Raeder, R. & Boyle, M. D. Analysis of immunoglobulin G-binding-protein  
603 expression by invasive isolates of *Streptococcus pyogenes*. *Clin. Diagn. Lab.*  
604 *Immunol.* **2**, 484–486 (1995).  
605
- 606 25. Gog, S., Beller, T., Moffat, A. & Petri, M. in *Exp. Algorithms SE - 28*  
607 (Gudmundsson, J. & Katajainen, J.) **8504**, 326–337 (Springer International  
608 Publishing, 2014).  
609
- 610 26. Sanderson, C. Armadillo: An Open Source C++ Linear Algebra Library for  
611 Fast Prototyping and Computationally Intensive Experiments. in *NICTA*  
612 *NICTA*, 1–16 (2010).

613

- 614 27. King, D. E. Dlib-ml: A Machine Learning Toolkit. *J. Mach. Learn. Res.* **10**,  
615 1755–1758 (2009).  
616
- 617 28. Kent, W. J. BLAT—The BLAST-Like Alignment Tool. *Genome Res.* **12**, 656–  
618 664 (2002).  
619
- 620 29. Zerbino, D. R. & Birney, E. Velvet: algorithms for de novo short read  
621 assembly using de Bruijn graphs. *Genome Res.* **18**, 821–9 (2008).  
622
- 623 30. Li, H. A statistical framework for SNP calling, mutation discovery,  
624 association mapping and population genetical parameter estimation from  
625 sequencing data. *Bioinformatics* **27**, 2987–2993 (2011).  
626
- 627 31. Cingolani, P. *et al.* A program for annotating and predicting the effects of  
628 single nucleotide polymorphisms, SnpEff: SNPs in the genome of  
629 *Drosophila melanogaster* strain w1118; iso-2; iso-3. *Fly (Austin)*. **6**, 1–13  
630 (2012).  
631
- 632 32. Dalquen, D. a, Anisimova, M., Gonnert, G. H. & Dessimoz, C. ALF--a  
633 simulation framework for genome evolution. *Mol. Biol. Evol.* **29**, 1115–23  
634 (2012).  
635
- 636 33. Chen, J. Q. *et al.* Variation in the ratio of nucleotide substitution and indel  
637 rates across genomes in mammals and bacteria. *Mol. Biol. Evol.* **26**, 1523–  
638 1531 (2009).  
639
- 640 34. Hu, X. *et al.* pIRS: Profile-based Illumina pair-end reads simulator.  
641 *Bioinformatics* **28**, 1533–1535 (2012).  
642
- 643 35. Cartwright, R. a. DNA assembly with gaps (Dawg): Simulating sequence  
644 evolution. *Bioinformatics* **21**, 31–38 (2005).  
645
- 646 36. Kosiol, C., Holmes, I. & Goldman, N. An empirical codon model for protein  
647 sequence evolution. *Mol. Biol. Evol.* **24**, 1464–1479 (2007).  
648
- 649 37. Cheng, L., Connor, T. R., Sirén, J., Aanensen, D. M. & Corander, J.  
650 Hierarchical and spatially explicit clustering of DNA sequences with BAPS  
651 software. *Mol. Biol. Evol.* **30**, 1224–8 (2013).  
652
- 653 38. Newman, S. C. in *Biostat. Methods Epidemiol.* 329–330 (John Wiley & Sons,

654 Inc., 2003). doi:10.1002/0471272612.app4  
655

## 656 **Acknowledgements**

657 We would like to thank James Hadfield for his help in integrating SEER's output  
658 into the bacterial genome visualisation tool JSCandy, and Jeff Barrett and his  
659 group for helpful discussions on the relation of association studies in human  
660 genetics to prokaryotic genetics.

661 This work was supported by Wellcome Trust grant 098051, MRC grant 1365620,  
662 ERC grant 239784, Academy of Finland grant 287665 and COIN Centre of  
663 Excellence.

## 664 **Competing Interests**

665 The authors declare no competing interests.

## 666 **Author Contributions**

667 JAL – Designed method, performed analysis, wrote manuscript.

668 MV – Designed method, performed analysis, wrote manuscript.

669 NV – Participated in method design, edited manuscript.

670 SRH – Helped with interpretation of *S. pyogenes* data

671 CC – Prepared genetic and metadata from Maela isolates.

672 NJC – Helped with interpretation of antibiotic resistance elements, edited  
673 manuscript.

674 PM – Participated in method design, edited manuscript.

675 AH – Participated in method design, edited manuscript.

676 JP – Advised on microbiological interpretation, edited manuscript.

677 SDB – Advised on microbiological interpretation, edited manuscript.

678 JC - Designed method, performed analysis, wrote manuscript.

## 679 **Data Access**

680 SEER is available at <https://github.com/johnlees/seer>, DSM at

681 <https://github.com/HIITMetagenomics/dsm-framework> and fsm-lite at

682 <https://github.com/nvalimak/fsm-lite>.

683 Scripts used to perform the simulations are available at

684 <https://github.com/johnlees/bioinformatics>

685 Results from the *S. pyogenes* invasiveness GWAS can be found at:  
686 <http://dx.doi.org/10.6084/m9.figshare.1613851> and can be loaded directly into  
687 JSCandy (<http://jameshadfield.github.io/JScandy/>) to view the results.

## 688 Figure Captions

689 Fig. 1: Using simulations and subsamples of the population as described in the  
690 online methods, power for a) detecting gene presence/absence at different odds-  
691 ratios b) using all informative k-mers versus a single length c) detecting k-mers  
692 near, in the correct gene, or containing the causal variant for trimethoprim  
693 resistance. All curves are logistic fits to the mean power over 100 subsamples.  
694

695 Fig. 2: Fine mapping trimethoprim resistance. The locus pictured contains 72  
696 significant k-mers, the most of any gene cluster. Coverage over the locus is  
697 pictured at the bottom of the figure. Shown above the genes are high quality  
698 missense SNPs, plotted using their p-value for affecting protein function as  
699 predicted by SIFT.

## 700 Figures

701 Fig. 1

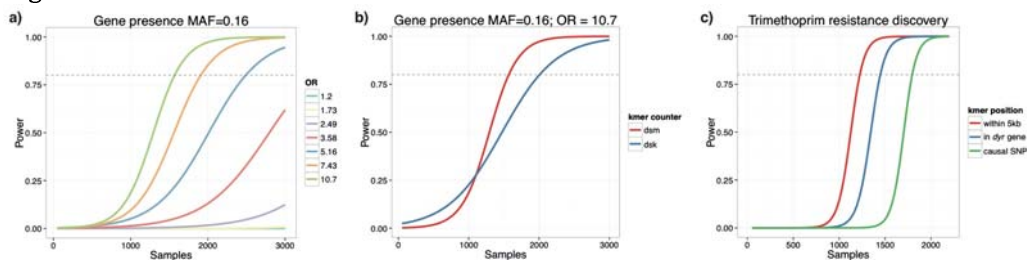

702  
703

Fig. 2

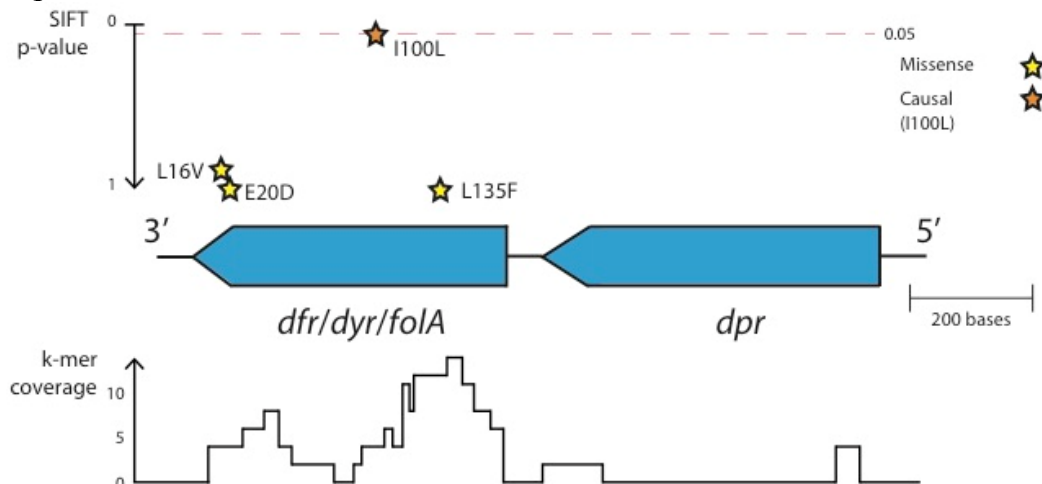

704

705 **Tables**

| Antibiotic       | Resistant samples | Number of significant k-mers |                     |                                                                                               |                                                            |
|------------------|-------------------|------------------------------|---------------------|-----------------------------------------------------------------------------------------------|------------------------------------------------------------|
|                  |                   | Total                        | Mapped to reference | Highest coverage annotation                                                                   | Causal element                                             |
| Chloramphenicol  | 204 (7%)          | 1 526                        | 1 526               | 1 508 – ICE<br>288 – ORF (UniParc B8ZK82)<br>206 – <i>rep</i><br>166 – <i>cat</i>             | 166 – <i>cat</i>                                           |
| Erythromycin     | 803 (26%)         | 1 154                        | 112                 | 10 – permease (UniParc B8ZKV5)<br>8 – <i>prfC</i><br>6 – <i>gatA</i><br>4 – ICE               | 4 – mega element<br>2 – <i>mef</i><br>2 – omega element    |
| $\beta$ -lactams | 1 563 (51%)       | 23 876                       | 17 453              | 381 – ICE<br>145 – prophage MM1<br>50 – SPN23F15110 (UniParc B8ZLE7)<br>49 – ICE <i>orf16</i> | 47 – <i>pbp2x</i><br>20 – <i>pbp2b</i><br>8 – <i>pbp1a</i> |
| Tetracycline     | 1 958 (64%)       | 962                          | 962                 | 962 – ICE<br>136 – ICE <i>orf16</i><br>121 – ICE <i>orf15</i><br>96 – <i>tetM</i>             | 96 – <i>tetM</i>                                           |
| Trimethoprim     | 2 553 (83%)       | 2 639                        | 210                 | 21 – <i>dyr</i>                                                                               | 21 – <i>dyr</i>                                            |

706

707 Table 1: Results from SEER for antibiotic resistance binary outcome on a  
 708 population of 3069 *S. pneumoniae*. Significant k-mers are first interpreted by  
 709 mapping to the ATCC 700669 reference genome. Up to the first four highest  
 710 covered annotations are shown, and if the known mechanism is amongst these it  
 711 is highlighted in orange. The ICE is the top hit in three analyses, as it carries  
 712 multiple drug-resistance elements and is commonly found in multi-drug  
 713 resistant strains<sup>16</sup>. The distribution of phenotype across the phylogeny is shown  
 714 in Supplementary figure 5.

715



716 **Supplementary data**

717

718 **Supplementary table 1:** Comparison of SEER with results from existing  
719 methods in finding genetic associations with antibiotic resistance in the  
720 Chewapreecha *et. al.* study of 3069 Thai carriage *S. pneumoniae* samples. For  
721 each of the five antibiotics, the true causal variant is listed, as are the number of  
722 hits passing the significance threshold for each method (plink and dsk) and the  
723 number which map to the correct region.

724

| Antibiotic      | Causal variant                                      | Significant sites |     | Near correct site  |                    | Notes                            |
|-----------------|-----------------------------------------------------|-------------------|-----|--------------------|--------------------|----------------------------------|
|                 |                                                     | plink             | dsk | plink              |                    |                                  |
| Tetracycline    | ICE, <i>tetM</i>                                    | 8 029             | 0   | <i>tetM</i> – 124  | ICE – 2240         |                                  |
| Chloramphenicol | ICE, <i>cat</i>                                     | 5 310             | 0   | <i>cat</i> – 0     | ICE – 1137         |                                  |
| β-lactams       | <i>pbp2x</i> , <i>pbp1a</i> , <i>pbp2b</i>          | 858               | 0   | <i>pbp2x</i> – 210 | <i>pbp1a</i> – 113 | <i>pbp2b</i> – 81                |
| Trimethoprim    | <i>dyr</i> (I100L)                                  | 4 009             | 0   | <i>dyr</i> – 47    | <i>dpr</i> – 53    | Causal SNP ranked 22nd           |
| Erythromycin    | <i>ermB</i> , <i>mef</i> , <i>mel</i> , <i>mefA</i> | 8 469             | 0   | None               |                    | Element not present in reference |

725

726

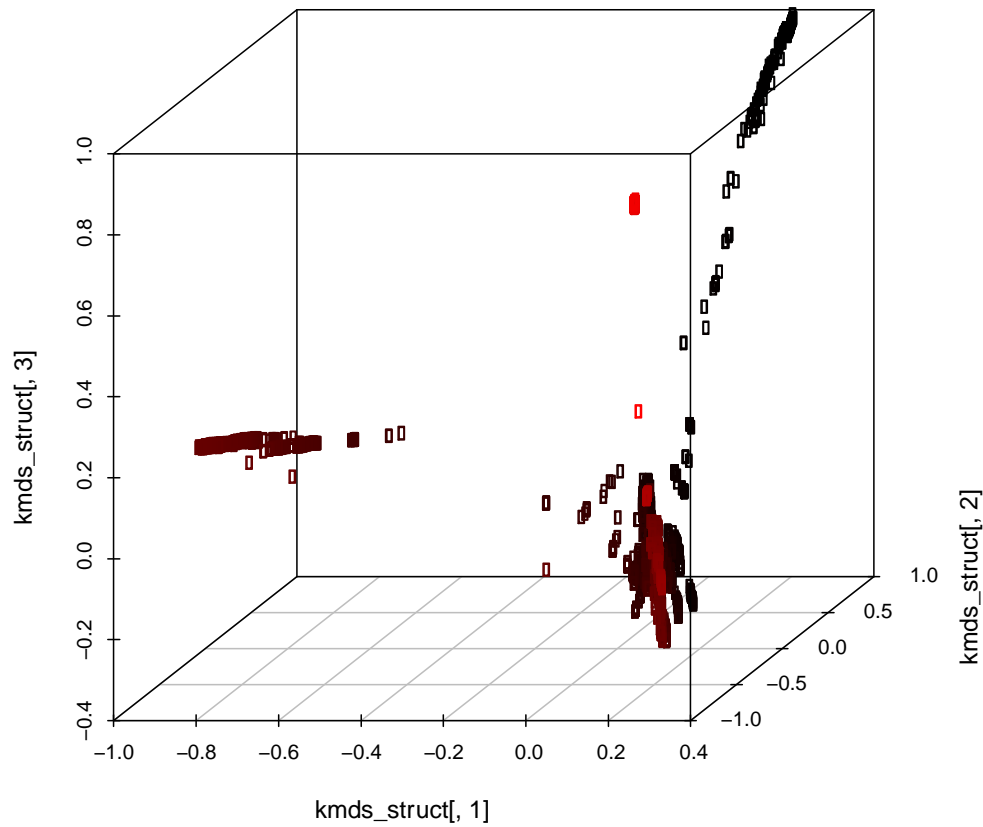

727

728 **Supplementary figure 1:** Plot of the k-mer distances projected into three  
729 dimensions by MDS for the Chewapreecha *et. al.* study of 3069 Thai carriage *S.*  
730 *pneumoniae* samples. Shade from black to red is by y-coordinate (2<sup>nd</sup> MDS  
731 component).  
732

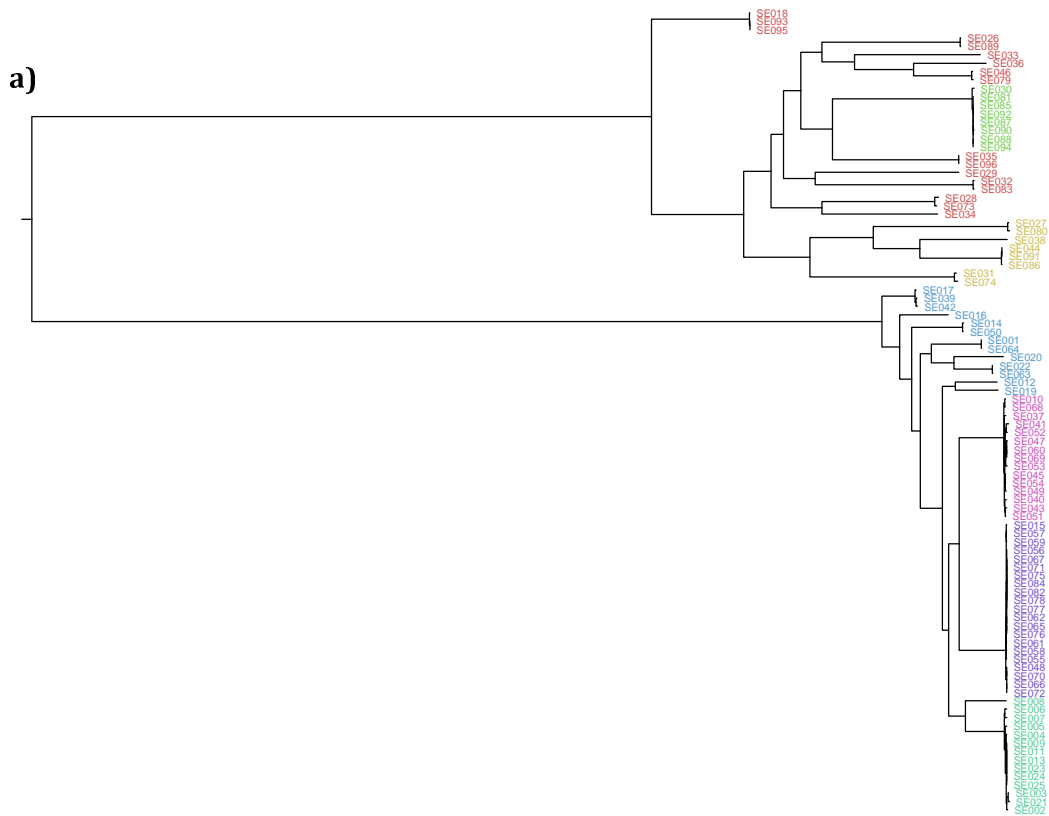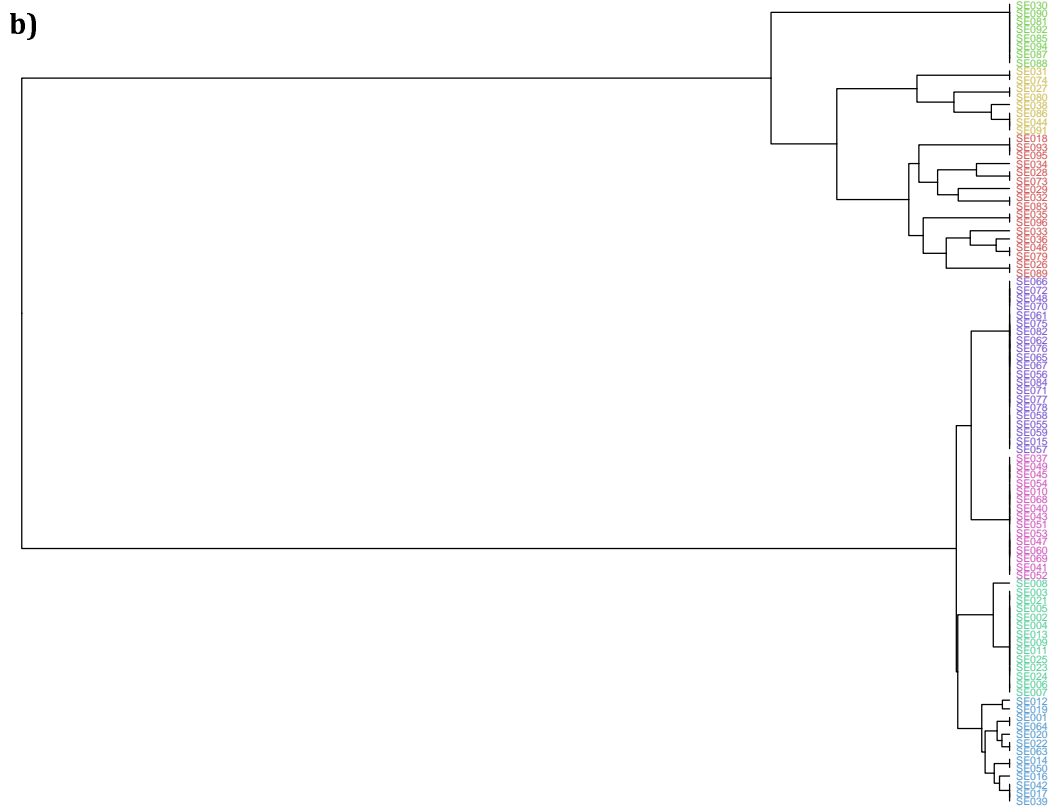

733 **Supplementary figure 2:** a) Tree used for Monte Carlo simulations of 96 *S.*  
734 *pneumoniae* genomes. b) UPGMA tree from k-mer distance matrix produced from

735 simulated reads. Colours are hierBAPS clusters.  
736  
737

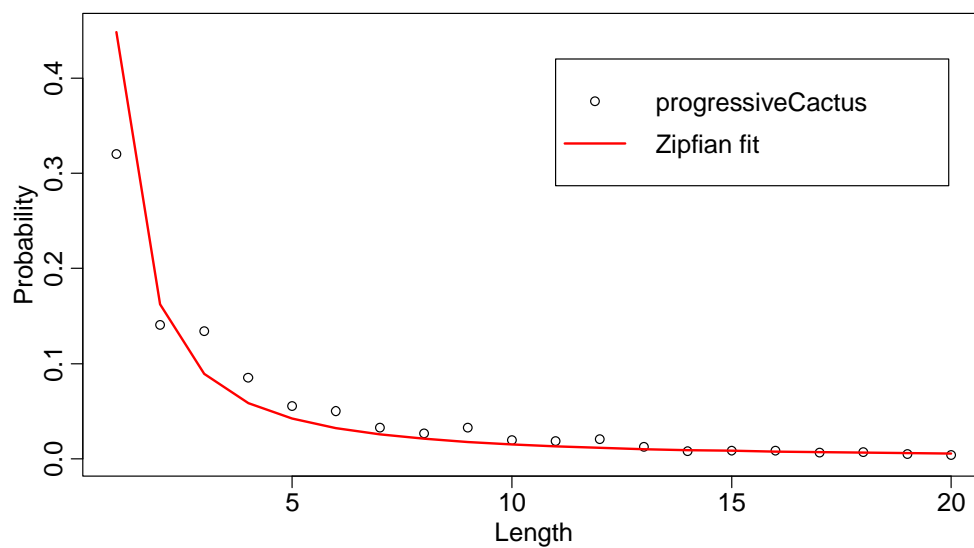

738

739

740 **Supplementary figure 3:** Estimated size distribution for INDELs, as estimated  
741 from a Progressive Cactus alignment of three members of the *Streptococcus*  
742 genus. A power law  $p=L^k$  (Zipfian function;  $p$  is probability,  $L$  is INDEL length,  $k$  is  
743 a free parameter) is fit to the data, the parameter  $k$  is used in the simulations.

743

744

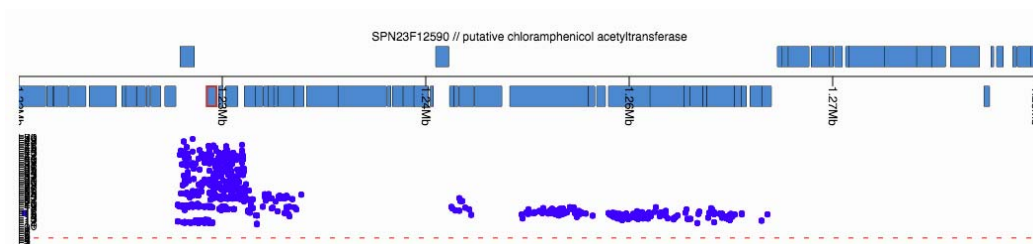

745

746

747

748 **Supplementary figure 4:** JScandy view of ATCC 700669 reference genome (blue

749 blocks at top genes on forward and reverse strands) and Manhattan plot of start

750 positions of the 1 508 of 1 526 k-mers significantly associated with

751 chloramphenicol resistance which map to the integrative conjugative element

752 (ICE) Tn5253. The hits are all in within the ICE, and the most significant hits

753 cluster around the *cat* gene (which is outlined in red).

754

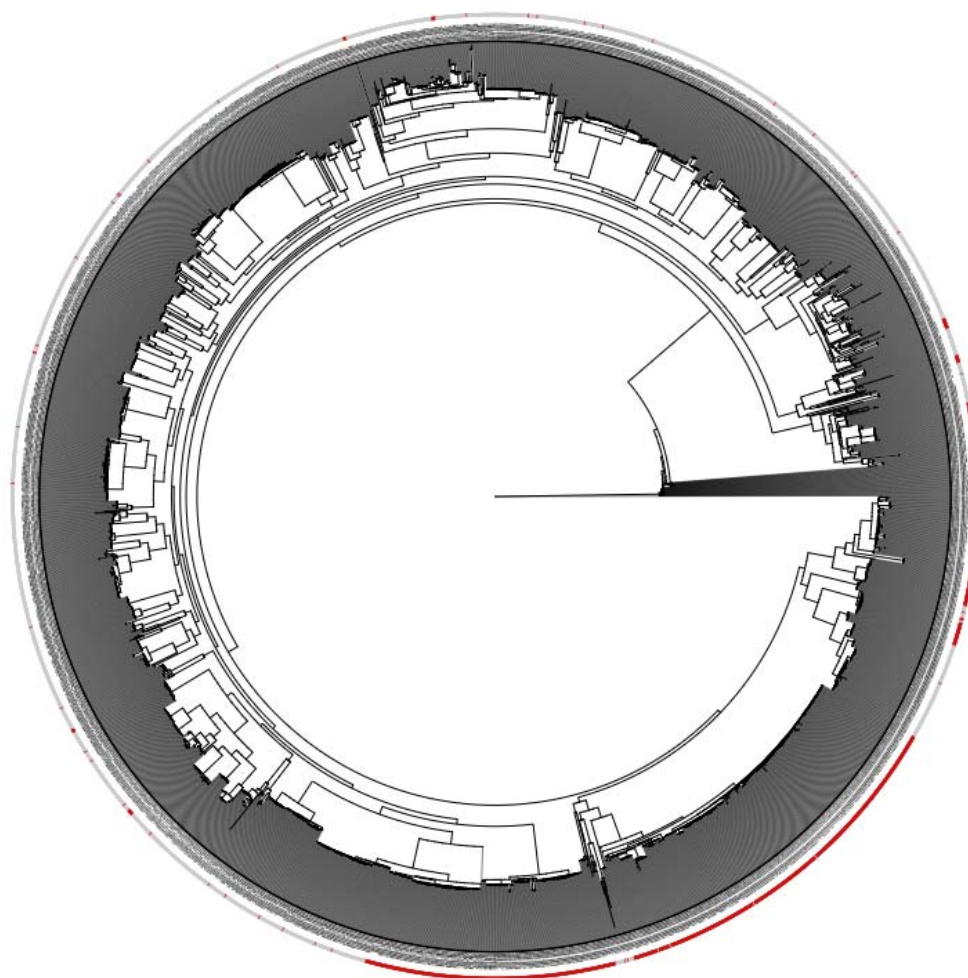

755

756 **Supplementary figure 5:** Neighbour joining tree from Chewapreecha *et. al.*

757 study of 3069 Thai carriage *S. pneumoniae* samples, from a SNP alignment

758 produced by mapping to the ATCC 700669 reference strain. Outer ring: red if

759 resistant to Erythromycin, grey if sensitive.

760

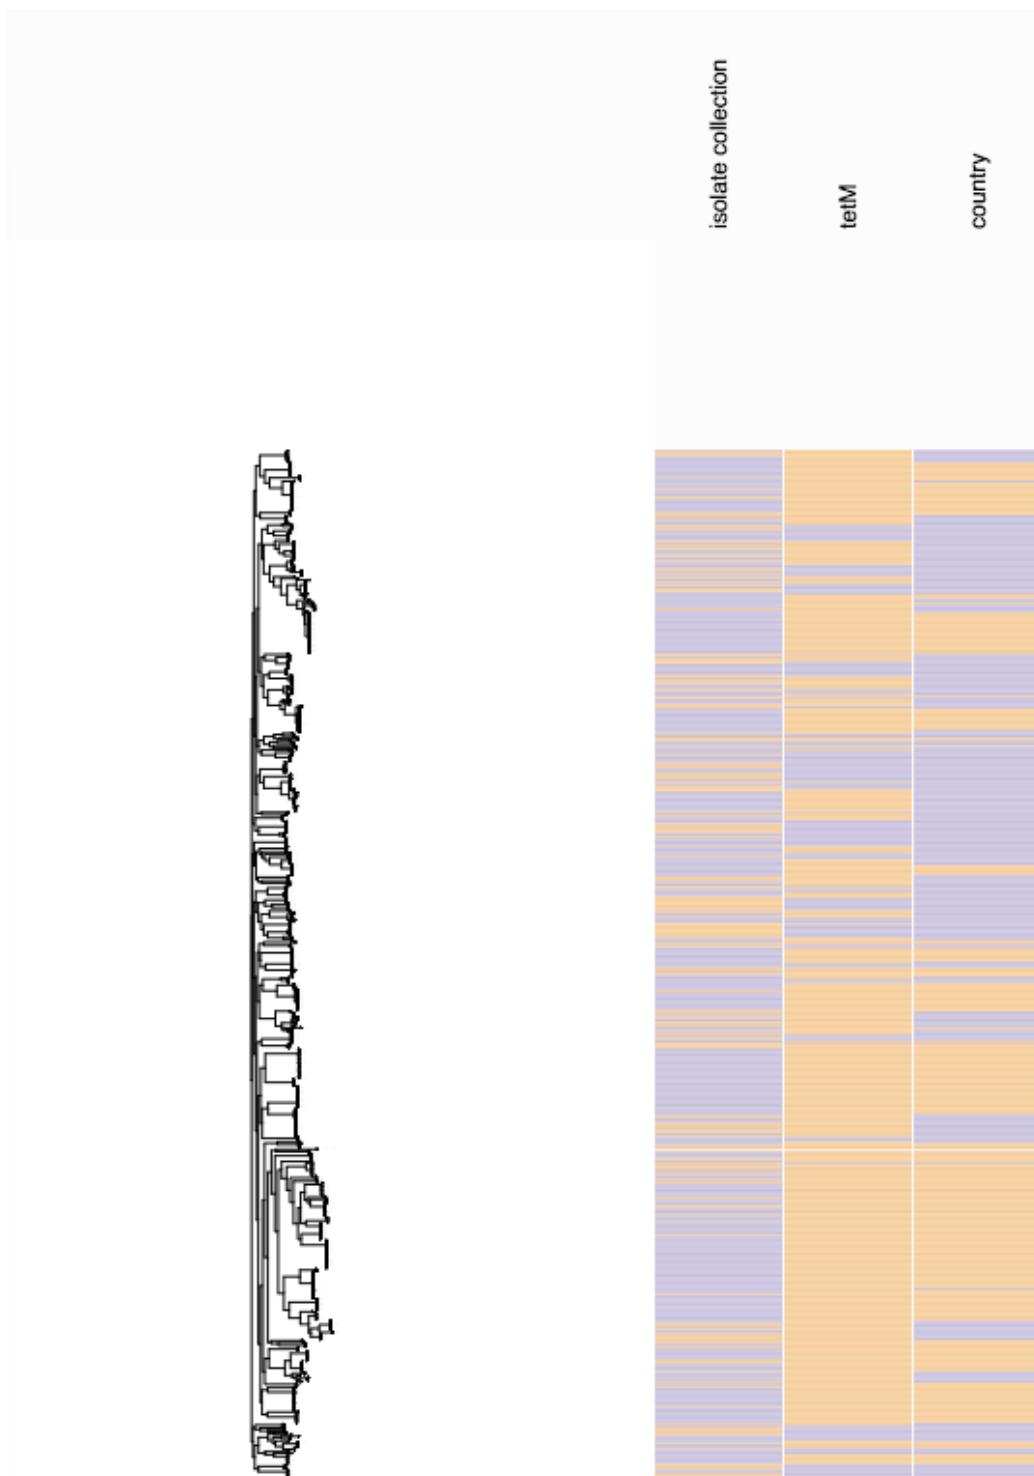

761

762

763

764

765

766

767

**Supplementary figure 6:** JSCandy view of *S. pyogenes* metadata on the right, showing whether isolates are invasive/non-invasive (orange/purple), presence of *tetM* (orange - absent, purple - present) and country of isolation (orange - Fiji, purple - Kilifi). Tree from a core genome alignment of all isolates is drawn on the left, with tips aligned to the metadata.



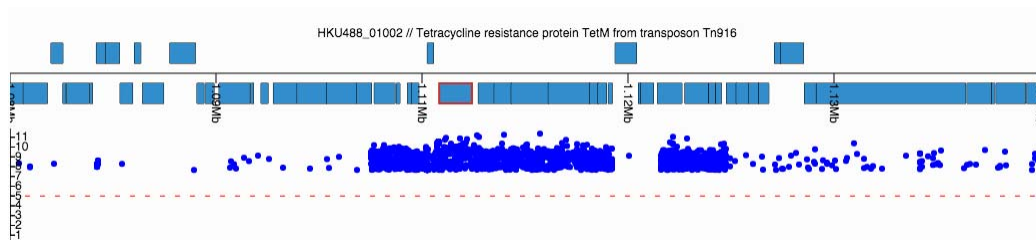

768

769

770

771

772

773

774

**Supplementary figure 7:** JScandy view of *S. pyogenes* HKU488 reference genome (blue blocks at top genes on forward and reverse strands, *tetM* highlighted in red) and Manhattan plot of start positions of k-mers significantly associated with invasiveness when not adjusted for country of origin.

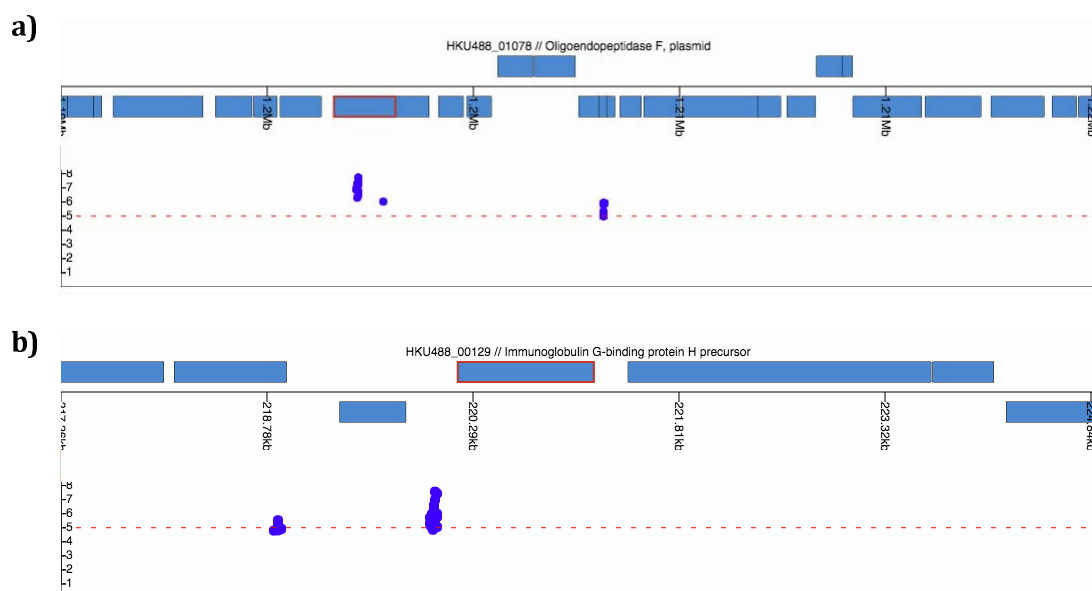

775

776

777

778

779

780

**Supplementary figure 8:** As supplementary figure 7, except with the Manhattan plot showing p-values when adjusted for country of isolation. a) *pepF*; b) IgG binding protein H precursor.

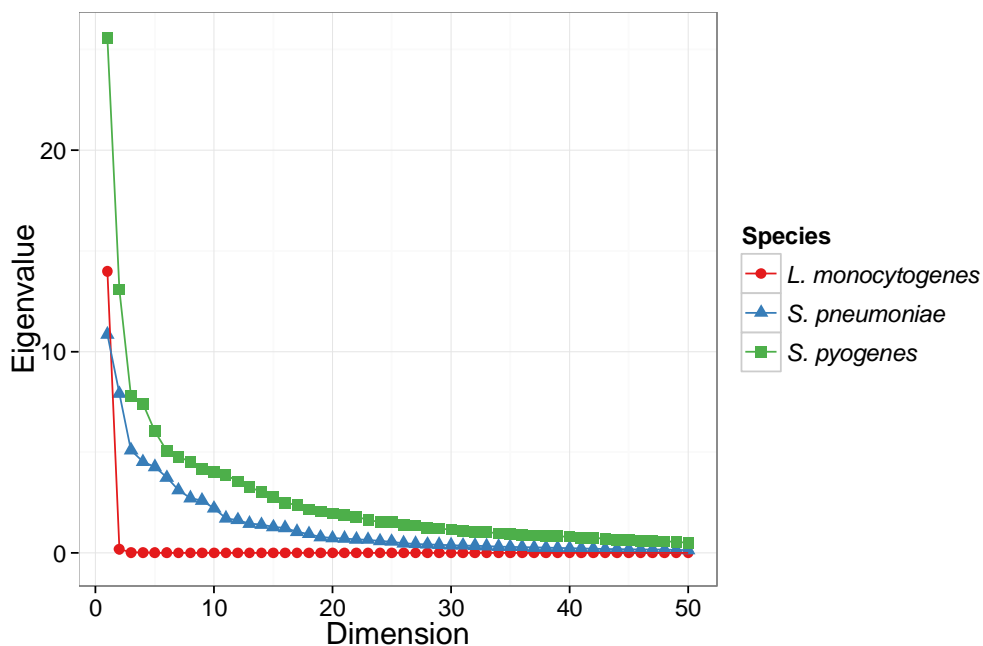

781

782

**Supplementary figure 9:** Scree plot for the first fifty dimensions of the 96

783 *Listeria monocytogenes* isolates (Supplementary figure 2) in red, 3 069

784 *Streptococcus pneumoniae* isolates (Supplementary figure 5) in blue, and 675

785 *Streptococcus pyogenes* isolates (Supplementary figures 6 and 7) in green.

786
